# Supplementary material for: Rheumatoid arthritis and stroke risk: a systematic review and meta-analysis
Source: PeerJ journal article supplement (doi:10.7717/peerj.20568), 2026-01-29
Supplement: Original_data.zip [file Data extraction and analysis.xlsx]

## Sheet: RA
Number	Author	Year	Country	Whether to include	Study Type	Participants source	Follow-up period	RA diagnostic criteria	Stroke diagnostic criteria	total Case	stroke group	Age(Mean±SD)	Sex	Outcome	Subgroup analysis	Confounders adjusted	Effect value type	Effect vaule	LL	DL
1	Kunihiko Tanaka (2016)	2016	Japan	√	retrospective cohort study	Medical Data Vision database	2011.4-2014.3	ICD-10， history of anti-RA drug prescription	ICD-10: I63, I61	40860	690	63.8 (15.1)RA 70.3(12.0) control	Female：5819（67.2）RA 22,046 (68.5)control OA	Japanese RA patients are at increased risk of stroke	NR	age, sex	IRR	1.68	1.41	2	Risk for cardiovascular disease in Japanese patients with rheumatoid arthritis:a large‑scale epidemiological study using a healthcare database
1	FREDERICK WOLFE (2001)	2001	USA	√	cohort study	National Data Bank for Rheumatic Diseases	6 months			11572		59.8 (13.0)RA 66(11.22)OA	male：23.1%RA 18.3% OA	RA is associated with an increased risk of CCVD from CVA	NR	age, sex, education level, smoking, income,hypertension, and body mass index	OR	1.7	1.3	2.24
2	Dong Hyun LeeID (2021)	2021	Korea	√	cohort study	NHIS	2004.1.1-2015.12.31	M05 (seropositive RA)ICD-10	ICD-10 codes I63 or I64	16590	64	54±8.7 RA 54±8.7conrtol	male：735（26.6%）RA male：3675（26.6%）control	an increased risk ofischemic stroke in patients with seropositive RA		age, sex, and comorbidities, including hypertension, diabetes mellitus, and dyslipidemia	HR	1.4	1.07	1.82
															male		HR	1.12	0.68	1.84
															female		HR	1.44	1.05	1.97
															＜65		HR	1.3	0.92	1.83
															≥65		HR	1.37	0.9	2.08
															Diabetes		HR	0.98	0.45	2.12
															No diabetes		HR	1.47	1.11	1.95
															Hypertension		HR	1.66	1.16	2.38
															No hypertension		HR	1.14	0.77	1.69
															Dyslipidemia		HR	0.92	0.46	1.83
															No Dyslipidemia		HR	1.43	1.07	1.91
3	Seonyoung Kang (2022)	2022	Korea	√	cohort study	NHIS	2010.1.1-2017.12.31	ICD-10-CM	ICD-10-CM codes I63，I64	818814	1830	<40y：12,943 (9.5)RA 64,715 (9.5)control	male:36,075(26.4)RA male:180,375(26.4)controls female：100,394(73.6)RA female：501,970(73.6)controls	RA patients are at increased risk of stroke		age, sex, smoking, alcohol drinking, regular exercise, obesity, DM, HTN, hyperlipidemia, CKD, and income	HR	1.23	1.16	1.29
												40-64y：95,857 (70.2）RA 479,285 (70.2)control
												≥65y：27,669（20.3）RA 138,345 (20.3)control
4	Kathleen Trömmer (2021)	2021	Germany	√	retrospective cohort study	IQVIA	2000.1-2015.12	ICD-10: M05, M06	ICD-10: I63, I64	58212	842	Age (mean, SD):54.8 (14.4)	male：35.0 case male：35.1 control female：65.0 case female：64.9 control	stroke	total	age, sex	HR	1.42	1.25	1.6
												18–30 y:6.5			female		HR	1.3	1.11	1.51
												31–40 y:10.1			male		HR	1.64	1.34	2.01
												41–50 y:20.5			Age 18–40 y		HR	3.45	1.3	9.18
												51–60 y:25.9			Age 41–60 y		HR	1.43	1.14	1.8
												＞60y：37.0			Age >60 y		HR	1.38	1.19	1.6
5	Brian B. Løgstrup (2020)	2020	Denmark	√	cohort study	DNPR	1996. - 2017.7.31	ICD-8，ICD-10	ICD-10	90192		≤64：8434 (56.1)RA 42 226 (56.2)GP	female:10037 (66.8)RA	RA is associated with an increased risk of stroke than found in the GP		age, sex and co-morbidity	HR	1.22	1.12	1.33
												65-74:4108 (27.3)RA 20 571 (27.4)GP	female:146,899(48.8)DM
												75+:2490 (16.6)RA 12 363 (16.4)GP	female:50185(66.8)GP
6	Marta Baviera (2021)	2021	Italy	√	cohort study	Lombardy region admin- istrative health databases	2005.1.1-2017.12.31	ICD-9-CM		516047	10476	59±14.3 RA 45.3±19.1 noRA	female:11,690 (72.8)RA 255,803(51.1)no-RA	stroke		age, sex, index year and comorbidities	HR	1.39	1.22	1.58
									ICD-10
7	Yih-Ru Chen(2017)	2017	Taiwan	√	cohort study	NHIRD	2006.1.1-2011.12.31	ICD-9-CM	ICD-9-CM codes 433-434, 436	52840	Ischemic stroke:114 Hemorrhagic stroke:79	18-24:928(8.78)RA	male:2,742(25.95)RA 10,968(25.95)non-RA	stroke	Ischemic stroke	age, sex, hypertension, diabetes mellitus, hyperlipidemia, CKD, cancer, PVD, mild liver disease, COPD, anticoagulants, antiplatelets, DMARDs, NSAIDs, glucocorticoids, and biologics.	HR	3.48	2.16	5.61
												3712(8.78)control			Hemorrhagic stroke		HR	1.35	0.67	2.71
												25-34:3014(28.52)RA					HR
												12,056(28.52)control			female		HR	2.8	2.31	3.39
												35-44:6,626(62.7)RA			male		HR	2.34	1.83	2.99
												26,504(62.70)control			No hypertension		HR	2.49	2.09	2.96
															hypertension		HR	2.57	1.9	3.48
															No diabetes		HR	2.55	2.18	2.99
															diabetes		HR	2.57	1.51	4.36
															No hyperlipidemia		HR	2.49	2.12	2.94
															hyperlipidemia		HR	2.66	1.78	3.96
9	Lisa Argnani (2021)	2021	Italy	√	retrospective cohort study	RECORD project were the AHDs of Lombardy	2004.1.1-2013.12.31	ICD-10	24 (DRG-24)ICD9-CM	270357	2692	female :61.7±13.7 RA 62.5±14.4 noRA	female:16,098(76%)RA 179,407(72%) noRA	stroke		age, sex, and CV risk factors	IRR	1.19	1	1.4
8	Kun Zou(2017)	2017	China	√	crosss-ectional study	MRD	2005 - 2015	ICD-10 codes: M05.0-M06.9		2044	56	58.5(0.4)OA	female：702(68.7)RA 702(68.7)control	stroke			OR	1.13	0.57	2.25
												57.8(0.4)RA					OR
																	OR
									ICD-10								OR
																	OR
																	OR
																	OR
																	OR
9	Shmuel Tiosano (2017)	2017	Israel	√	Cross-sectional study	Clalit Health Services (CHS)	xx-2016	ICD-10	ICD-10	69755	4361	≤65y：49.8±13.2 RA	≤65y female：5,115 (76.7)RA	RA is independently associated with stroke	total		OR	1.18	1.09	1.28
												49.7±13.2 noRA	25,454 (76.7) NO RA		female		OR	1.27	1.16	1.39
												＞65y：75.8±7.06 RA	＞65y female:3,988 (77.9)RA		male		OR	1.15	0.99	1.33
												75.8±7.09 no RA	19,135 (77.3)NO RA		≤65		OR	1.72	1.49	1.99
															＞65		OR	1.09	0.99	1.19
10	Tsan-Hon Liou(2014)	2014	Taiwan	√	retrospective cohort study	LHID2005	2004.1.1 - 2007.12.31	ICD-9-CM codes 714.0	ICD-9-CM codes 430–438	30570	383	≤30：515 (8.4)RA/2060 (8.4)	Male：1752 (28.7)RA 7008 (28.7)control female：4362 (71.3)RA 17448 (71.3)control	RA is risk factor for ischemic stroke.		Adjustments were made for age, gender, urbanization level, diabetes mellitus, hypertension, hyperlipidemia, coronary heart diseases,congestive heart failure,hypercoagulability, renal disease, atrial fibrillation, valvular heart disease, Aspirin use, Hydroxychloroquine use and NSAIDs use.	HR	1.32	1.15	1.5
												31–40：754 (12.3)/3016 (12.3)
												41–50:1315 (21.5)/5260 (21.5)
												51–60:1500 (24.5)/6000 (24.5)
												61–70:1102 (18.0)/4408 (18.0)
												＞70：928 (20.0)/3712 (15.2)
13	Jesper Lindhardsen (2012)	2012	Danish	√	cohort study	on nationwide data from inpatient and outpatient hospital care in Denmark	1997- 2009	ICD-10		18247	139	NR		Rheumatoid arthritis was associated with a significantly increased risk of and stroke		NR	IRR	1.32	1.22	1.42
									ICD-10
11	Yih‑Ru Chen(2018)	2018	Taiwan	√	cohort study	NHI	2006-2011	ICD-9-CM	ICD-9-CM codes 430,431，433-437	3190	521	71.42 (10.93)RA 71.34 (10.96) NORA	male：300 (47.02)RA 1200 (47.02) control			age, sex, urbanicity, NIHSS, chronic kidney disease, non-steroidal anti-inflammatory drugs, disease-modifying anti- rheumatic drugs and glucocorti- coids as appropriate.	HR	1.37	1.11	1.68
															Ischemic stroke		HR	1.41	1.13	1.74
															Hemorrhagic stroke		HR	0.6	0.19	1.85
																	HR
															female		HR	1.6	1.2	2.12
															male		HR	1.16	0.82	1.64
															No hypertension		HR	1.22	0.21	7.11
															Hypertension		HR	1.41	1.13	1.75
															No diabetes		HR	1.3	0.95	1.8
															Diabetes		HR	1.5	1.12	2.02
															No hyperlipidemia		HR	1.53	1.06	2.2
															hyperlipidemia		HR	1.35	1.04	1.77
12	Alsing CL（2025）	2025	Korea	√	retrospective cohort study	NHIS	2010-2017	ICD-10	ICD-10	45175	3950	57.4±9.6	Male 43,956(24.3)			sex, age, income, smoking, alcohol drinking, physical activity, and obesity, diabetes, hypertension, hyperlipidemia, chronic kidney disease, and atrial fibrillation.	HR	1.43	1.33	1.53
															ischemic stroke		HR	1.47	1.36	1.58
															Hemorrhagic stroke		HR	1.31	1.15	1.5
																	HR
																	HR
																	HR
